# Supplementary material for: Schizochytrium spp. Dietary Supplementation Modulates Immune-Oxidative Transcriptional Signatures in Monocytes and Neutrophils of Dairy Goats
Source: MDPI journal article supplement (doi:10.3390/antiox12020497), 2023-02-16
Supplement: s1 [file s1]

**Table S1.** Chemical composition (g/Kg, as fed) and fatty acids profile (% of total fatty acid) of the diets.

| Chemical composition               | CON  | ALG20 | ALG40 | ALG60 | Alfalfa hay | DHAgold™ |
|------------------------------------|------|-------|-------|-------|-------------|----------|
| Dry matter                         | 922  | 927   | 918   | 926   | 927         | 980      |
| Crude protein                      | 126  | 127   | 127   | 127   | 134         | 167      |
| Ether extract                      | 43   | 57    | 63    | 79    | 13          | 556      |
| Crude fiber                        | 50   | 52    | 52    | 56    | 319         | 45       |
| NDF                                | 157  | 152   | 149   | 169   | 503         | -        |
| ADF                                | 61   | 56    | 57    | 64    | 381         | -        |
| Ash                                | 92   | 95    | 93    | 89    | 72          | 88       |
| <b>Fatty acid composition</b>      |      |       |       |       |             |          |
| C <sub>14:0</sub>                  | 0.1  | 1.4   | 2.8   | 3.7   | 2.3         | 5.9      |
| C <sub>16:0</sub>                  | 14.3 | 15.2  | 17.1  | 18.7  | 31.6        | 13.1     |
| C <sub>18:0</sub>                  | 3.9  | 3.2   | 2.7   | 2.5   | 5.8         | 0.3      |
| <sup>Cis-9</sup> C <sub>18:1</sub> | 36.1 | 29.8  | 24.2  | 21.8  | 11.6        | n.d.     |
| C <sub>18:2 n-6</sub>              | 42.2 | 36.5  | 31.1  | 28.6  | 26.4        | n.d.     |
| C <sub>18:3 n-3</sub>              | 1.7  | 1.6   | 1.3   | 1.2   | 19.7        | 0.1      |
| C <sub>22:5 n-6</sub>              | n.d. | 2.9   | 5.3   | 6.2   | n.d.        | 6.8      |
| C <sub>22:6 n-3</sub>              | 0.1  | 7.3   | 13.4  | 15.5  | n.d.        | 21.8     |

n.d.= no detectable; CON= control concentrate without experimental factors; ALG20= control concentrate with 20 g/ Kg *Schizochytrium spp.*; ALG40= control concentrate with 40 g/ Kg *Schizochytrium spp.*; ALG60= control concentrate with 60 g/ Kg *Schizochytrium spp.*; DHAgold= DSM feed industry (DSM Nutritional Products, Marousi, Greece); NDF= Neutral detergent fiber; ADF= Acid detergent fiber.

**Table S2.** Mean and standard error of means (SEM) of relative transcript levels of several anti- and pro-oxidant-related and immune-related genes expressions in monocytes of goats fed the four experimental diets (CON, ALG20, ALG40 and ALG60) at three sampling time (20th, 40th and 60th).

|                | DIET (D)            |                     |                     |                      |        | SAMPLING TIME (T)   |                     |                     |        | EFFECT‡ |       |       |
|----------------|---------------------|---------------------|---------------------|----------------------|--------|---------------------|---------------------|---------------------|--------|---------|-------|-------|
|                | CON                 | ALG20               | ALG40               | ALG60                | SEM†   | 20                  | 40                  | 60                  | SEM†   | D       | T     | DxT   |
| <i>CAT</i>     | 0.224               | 0.217               | 0.219               | 0.240                | 0.012  | 0.190 <sup>a</sup>  | 0.226 <sup>b</sup>  | 0.259 <sup>c</sup>  | 0.005  | 0.562   | 0.001 | 0.559 |
| <i>MGST1</i>   | 0.354               | 0.212               | 0.250               | 0.196                | 0.089  | 0.078 <sup>a</sup>  | 0.552 <sup>b</sup>  | 0.128 <sup>c</sup>  | 0.062  | 0.606   | 0.001 | 0.682 |
| <i>MGST2</i>   | 0.025               | 0.020               | 0.022               | 0.020                | 0.007  | 0.009 <sup>a</sup>  | 0.045 <sup>b</sup>  | 0.011 <sup>a</sup>  | 0.004  | 0.961   | 0.002 | 0.971 |
| <i>MGST3</i>   | 0.005               | 0.004               | 0.019               | 0.016                | 0.005  | 0.005 <sup>a</sup>  | 0.022 <sup>b</sup>  | 0.006 <sup>a</sup>  | 0.003  | 0.132   | 0.007 | 0.176 |
| <i>GSR</i>     | 0.181               | 0.147               | 0.144               | 0.148                | 0.016  | 0.074 <sup>a</sup>  | 0.324 <sup>b</sup>  | 0.067 <sup>a</sup>  | 0.010  | 0.357   | 0.001 | 0.945 |
| <i>SOD1</i>    | 1.408               | 1.597               | 1.603               | 1.823                | 0.165  | 0.877 <sup>a</sup>  | 3.085 <sup>b</sup>  | 0.861 <sup>a</sup>  | 0.145  | 0.390   | 0.001 | 0.505 |
| <i>SOD2</i>    | 1.847 <sup>a</sup>  | 1.264 <sup>ab</sup> | 1.269 <sup>ab</sup> | 0.938 <sup>b</sup>   | 0.225  | 0.481 <sup>a</sup>  | 3.00 <sup>b</sup>   | 0.509 <sup>a</sup>  | 0.180  | 0.010   | 0.001 | 0.063 |
| <i>SOD3</i>    | 0.0070 <sup>a</sup> | 0.0003 <sup>b</sup> | 0.0010 <sup>b</sup> | 0.0030 <sup>b</sup>  | 0.002  | 0.002 <sup>a</sup>  | 0.006 <sup>b</sup>  | 0.001 <sup>c</sup>  | 0.001  | 0.044   | 0.016 | 0.105 |
| <i>GPX1</i>    | 26.510              | 23.512              | 23.790              | 26.868               | 2.654  | 12.488 <sup>a</sup> | 46.464 <sup>b</sup> | 16.558 <sup>a</sup> | 2.319  | 0.726   | 0.001 | 0.762 |
| <i>GPX2</i>    | 0.0015              | 0.0014              | 0.0013              | 0.0014               | 0.0001 | 0.001 <sup>a</sup>  | 0.0023 <sup>b</sup> | 0.001 <sup>a</sup>  | 0.0001 | 0.909   | 0.014 | 0.909 |
| <i>GPX3</i>    | 0.252               | 0.049 <sup>t</sup>  | 0.068 <sup>t</sup>  | 0.278 <sup>t</sup>   | 0.086  | 0.099 <sup>a</sup>  | 0.345 <sup>b</sup>  | 0.040 <sup>c</sup>  | 0.078  | 0.099   | 0.013 | 0.328 |
| <i>NOX1</i>    | 0.098 <sup>t</sup>  | 0.170               | 0.180 <sup>t</sup>  | 0.182 <sup>t</sup>   | 0.031  | 0.074 <sup>a</sup>  | 0.331 <sup>b</sup>  | 0.068 <sup>a</sup>  | 0.020  | 0.067   | 0.001 | 0.308 |
| <i>NOX2</i>    | 5.294 <sup>at</sup> | 8.376 <sup>ab</sup> | 9.227 <sup>b</sup>  | 8.364 <sup>iab</sup> | 1.279  | 3.612 <sup>a</sup>  | 16.192 <sup>b</sup> | 3.642 <sup>a</sup>  | 0.618  | 0.042   | 0.001 | 0.158 |
| <i>COX2</i>    | 1.103 <sup>a</sup>  | 0.670 <sup>ab</sup> | 0.478 <sup>b</sup>  | 0.188 <sup>b</sup>   | 0.206  | 0.168 <sup>a</sup>  | 1.480 <sup>b</sup>  | 0.181 <sup>a</sup>  | 0.128  | 0.035   | 0.001 | 0.038 |
| <i>ALOX12</i>  | 0.025               | 0.025               | 0.028               | 0.025                | 0.004  | 0.013 <sup>a</sup>  | 0.047 <sup>b</sup>  | 0.016 <sup>a</sup>  | 0.003  | 0.891   | 0.001 | 0.724 |
| <i>ALOX5AP</i> | 0.855 <sup>a</sup>  | 0.629 <sup>ab</sup> | 0.435 <sup>ab</sup> | 0.268 <sup>b</sup>   | 0.182  | 0.235 <sup>a</sup>  | 1.133 <sup>b</sup>  | 0.272 <sup>a</sup>  | 0.151  | 0.033   | 0.001 | 0.046 |
| <i>PLA2G4A</i> | 0.015               | 0.012               | 0.011               | 0.011                | 0.002  | 0.006 <sup>a</sup>  | 0.026 <sup>b</sup>  | 0.006 <sup>a</sup>  | 0.002  | 0.490   | 0.001 | 0.278 |
| <i>LTC4S</i>   | 0.011               | 0.009               | 0.010               | 0.008                | 0.001  | 0.005 <sup>a</sup>  | 0.018 <sup>b</sup>  | 0.005 <sup>a</sup>  | 0.001  | 0.580   | 0.001 | 0.867 |
| <i>LTA4H</i>   | 0.103 <sup>ab</sup> | 0.082 <sup>a</sup>  | 0.092 <sup>a</sup>  | 0.122 <sup>b</sup>   | 0.008  | 0.058 <sup>a</sup>  | 0.176 <sup>b</sup>  | 0.065 <sup>a</sup>  | 0.008  | 0.015   | 0.001 | 0.867 |
| <i>PTGER2</i>  | 0.456 <sup>a</sup>  | 0.204 <sup>b</sup>  | 0.207 <sup>b</sup>  | 0.120 <sup>b</sup>   | 0.060  | 0.020 <sup>a</sup>  | 0.071 <sup>b</sup>  | 0.010 <sup>a</sup>  | 0.035  | 0.004   | 0.001 | 0.001 |

Means with different superscript (a, b, c, d) between dietary treatments and (a, b, c) between sampling time differ significantly ( $p \leq 0.05$ ) while, t ; trend refers to  $p < 0.10$ .

CON= control concentrate without microalgae; ALG20= control concentrate with 20 g/ Kg *Schizochytrium* spp.; ALG40= control concentrate with 40 g/ Kg *Schizochytrium* spp.;

ALG60= control concentrate with 60 g/ Kg *Schizochytrium* spp.

‡ Effect: The dietary treatment (D), time (T), and the interaction between dietary treatment x time (DxT) effects were analyzed by ANOVA using a general linear model (GLM) for repeated measures and *Post hoc* analysis was performed when appropriate using LSD multiple range test. †SEM: Standard error of the mean

**Table S3.** Mean and standard error of means (SEM) of relative transcript levels of several anti- and pro-oxidant-related and immune-related genes expressions in neutrophils of goats fed the four experimental diets (CON, ALG20, ALG40 and ALG60) at three sampling time (20th, 40th and 60th).

|                | DIET (D)           |                     |                     |                     |        | SAMPLING TIME (T)   |                     |                     |        | EFFECT |       |       |
|----------------|--------------------|---------------------|---------------------|---------------------|--------|---------------------|---------------------|---------------------|--------|--------|-------|-------|
|                | CON                | ALG20               | ALG40               | ALG60               | SEM    | 20                  | 40                  | 60                  | SEM    | D      | T     | DxT   |
| <i>CAT</i>     | 0.171              | 0.210               | 0.171               | 0.190               | 0.016  | 0.164 <sup>a</sup>  | 0.187 <sup>ab</sup> | 0.807 <sup>b</sup>  | 0.012  | 0.312  | 0.054 | 0.229 |
| <i>MGST1</i>   | 0.413 <sup>a</sup> | 0.334 <sup>ab</sup> | 0.333 <sup>ab</sup> | 0.281 <sup>b</sup>  | 0.040  | 0.269 <sup>a</sup>  | 0.415 <sup>b</sup>  | 0.358 <sup>b</sup>  | 0.029  | 0.037  | 0.001 | 0.413 |
| <i>MGST2</i>   | 0.018              | 0.018               | 0.014               | 0.012               | 0.005  | 0.013               | 0.016               | .017                | 0.003  | 0.697  | 0.374 | 0.527 |
| <i>MGST3</i>   | 0.004              | 0.003               | 0.010               | 0.009               | 0.004  | 0.006               | 0.009               | 0.006               | 0.002  | 0.142  | 0.235 | 0.412 |
| <i>GSR</i>     | 0.353              | 0.207               | 0.344               | 0.221               | 0.083  | 0.250               | 0.336               | 0.286               | 0.067  | 0.469  | 0.527 | 0.432 |
| <i>SOD1</i>    | 0.418              | 0.458               | 0.339               | 0.424               | 0.050  | 0.393               | 0.403               | 0.433               | 0.031  | 0.405  | 0.505 | 0.618 |
| <i>SOD2</i>    | 4.284              | 4.738               | 3.779               | 2.503               | 1.061  | 1.882 <sup>a</sup>  | 5.421 <sup>b</sup>  | 4.532 <sup>b</sup>  | 0.884  | 0.152  | 0.002 | 0.792 |
| <i>SOD3</i>    | 0.0014             | 0.0018              | 0.0011              | 0.0011              | 0.0001 | 0.001               | 0.002               | 0.001               | 0.0001 | 0.391  | 0.292 | 0.651 |
| <i>GPX1</i>    | 35.89              | 27.324              | 30.892              | 26.167              | 3.777  | 22.156 <sup>a</sup> | 31.582 <sup>b</sup> | 36.826 <sup>b</sup> | 2.519  | 0.298  | 0.001 | 0.268 |
| <i>GPX2</i>    | 0.010 <sup>a</sup> | 0.004 <sup>b</sup>  | 0.007 <sup>ab</sup> | 0.005 <sup>b</sup>  | 0.002  | 0.006 <sup>a</sup>  | 0.005 <sup>b</sup>  | 0.010 <sup>b</sup>  | 0.001  | 0.036  | 0.046 | 0.380 |
| <i>GPX3</i>    | 0.167              | 0.213               | 0.146               | 0.137               | 0.058  | 0.159               | 0.195               | 0.148               | 0.036  | 0.793  | 0.729 | 0.719 |
| <i>NOX1</i>    | 0.012 <sup>a</sup> | 0.023 <sup>ab</sup> | 0.013 <sup>a</sup>  | 0.025 <sup>b</sup>  | 0.003  | 0.015 <sup>a</sup>  | 0.024 <sup>b</sup>  | 0.018 <sup>ab</sup> | 0.002  | 0.043  | 0.033 | 0.194 |
| <i>NOX2</i>    | 1.993 <sup>a</sup> | 2.49 <sup>ab</sup>  | 2.021 <sup>a</sup>  | 2.749 <sup>b</sup>  | 0.207  | 1.907 <sup>a</sup>  | 2.792 <sup>b</sup>  | 2.248 <sup>ab</sup> | 0.156  | 0.045  | 0.001 | 0.071 |
| <i>COX2</i>    | 0.433 <sup>t</sup> | 0.356               | 0.274               | 0.245 <sup>t</sup>  | 0.084  | 0.258 <sup>a</sup>  | 0.439 <sup>b</sup>  | 0.258 <sup>b</sup>  | 0.051  | 0.066  | 0.029 | 0.749 |
| <i>ALOX12</i>  | 0.016              | 0.015               | 0.013               | 0.012               | 0.002  | 0.010 <sup>a</sup>  | 0.015 <sup>b</sup>  | 0.017 <sup>b</sup>  | 0.002  | 0.595  | 0.001 | 0.858 |
| <i>ALOX5AP</i> | 2.107              | 1.964               | 1.589               | 1.374               | 0.379  | 1.456               | 2.188               | 1.754               | 0.289  | 0.409  | 0.113 | 0.599 |
| <i>PLA2G4A</i> | 0.008              | 0.008               | 0.008               | 0.009               | 0.001  | 0.011 <sup>a</sup>  | 0.008 <sup>b</sup>  | 0.005 <sup>c</sup>  | 0.001  | 0.936  | 0.001 | 0.584 |
| <i>LTC4S</i>   | 0.007              | 0.004               | 0.006               | 0.005               | 0.002  | 0.008               | 0.004               | 0.005               | 0.001  | 0.760  | 0.281 | 0.114 |
| <i>LTA4H</i>   | 0.124 <sup>a</sup> | 0.071 <sup>b</sup>  | 0.102 <sup>ab</sup> | 0.086 <sup>ab</sup> | 0.016  | 0.078               | 0.094               | 0.115               | 0.012  | 0.028  | 0.107 | 0.715 |
| <i>PTGER2</i>  | 0.756 <sup>a</sup> | 0.467 <sup>ab</sup> | 0.491 <sup>ab</sup> | 0.329 <sup>b</sup>  | 0.123  | 0.316 <sup>a</sup>  | 0.687 <sup>b</sup>  | 0.506 <sup>ab</sup> | 0.089  | 0.024  | 0.009 | 0.771 |

Means with different superscript (a, b, c, d) between dietary treatments and (a, b, c) between sampling time differ significantly ( $p \leq 0.05$ ) while, t ; trend refers to  $p < 0.10$ .

CON= control concentrate without microalgae; ALG20= control concentrate with 20 g/ Kg *Schizochytrium* spp.; ALG40= control concentrate with 40 g/ Kg *Schizochytrium* spp.;

ALG60= control concentrate with 60 g/ Kg *Schizochytrium* spp.

‡ Effect: The dietary treatment (D), time (T), and the interaction between dietary treatment x time (DxT) effects were analyzed by ANOVA using a general linear model (GLM) for repeated measures and *Post hoc* analysis was performed when appropriate using LSD multiple range test. †SEM: Standard error of the mean
